# Supplementary material
Source: HighWire-hosted journal article supplement (https://www.rsfjournal.org/highwire/filestream/3467/field_highwire_adjunct_files/0/Warner_Kaiser_Houle_online_appendix_tables.pdf)
Supplement: Warner_Kaiser_Houle_online_appendix_tables.pdf [file Warner_Kaiser_Houle_online_appendix_tables.pdf]

**Table A1. Linear probability models predicting young adult employment (employed in any month since last interview)**

|                                            | <i>Model 1</i>       | <i>Model 2</i>       | <i>Model 3</i>       | <i>Model 4</i>      |
|--------------------------------------------|----------------------|----------------------|----------------------|---------------------|
| Young adult incarceration                  | -0.166***<br>(0.025) | -0.166***<br>(0.025) | -0.167***<br>(0.025) | -0.022<br>(0.067)   |
| Low hidden sentences<br>(referent)         | --                   | --                   | --                   | --                  |
| Mid hidden sentences                       |                      | -0.018<br>(0.013)    | -0.006<br>(0.016)    | 0.001<br>(0.016)    |
| High hidden sentences                      |                      | -0.019<br>(0.013)    | 0.003<br>(0.020)     | 0.009<br>(0.020)    |
| <i>Interactions</i>                        |                      |                      |                      |                     |
| Incarceration X Mid HS                     |                      |                      |                      | -0.158*<br>(0.075)  |
| Incarceration X High HS                    |                      |                      |                      | -0.158*<br>(0.076)  |
| <i>Controls</i>                            |                      |                      |                      |                     |
| Gender (male=1)                            | 0.053***<br>(0.008)  | 0.053***<br>(0.008)  | 0.053***<br>(0.008)  | 0.054***<br>(0.008) |
| White (referent)                           | --                   | --                   | --                   | --                  |
| Black                                      | -0.033**<br>(0.010)  | -0.031**<br>(0.010)  | -0.034**<br>(0.011)  | -0.034**<br>(0.011) |
| Other race                                 | -0.008<br>(0.012)    | -0.008<br>(0.012)    | -0.003<br>(0.012)    | -0.004<br>(0.012)   |
| Less than high school degree<br>(referent) | --                   | --                   | --                   | --                  |
| High school degree                         | 0.021<br>(0.017)     | 0.021<br>(0.017)     | 0.020<br>(0.017)     | 0.020<br>(0.017)    |
| Two-year college (no degree)               | 0.064***<br>(0.018)  | 0.065***<br>(0.018)  | 0.066***<br>(0.018)  | 0.065***<br>(0.018) |
| Two-year college (degree)                  | 0.096***<br>(0.021)  | 0.095***<br>(0.021)  | 0.095***<br>(0.021)  | 0.095***<br>(0.021) |
| Four-year college (no degree)              | 0.096***<br>(0.018)  | 0.095***<br>(0.018)  | 0.094***<br>(0.018)  | 0.093***<br>(0.018) |
| Four-year college (degree)                 | 0.135***<br>(0.017)  | 0.135***<br>(0.017)  | 0.135***<br>(0.017)  | 0.135***<br>(0.017) |
| Unmarried (referent)                       | --                   | --                   | --                   | --                  |
| Cohabiting                                 | 0.032**<br>(0.011)   | 0.032**<br>(0.011)   | 0.032**<br>(0.011)   | 0.032**<br>(0.011)  |
| Married                                    | -0.020+<br>(0.012)   | -0.019+<br>(0.012)   | -0.020+<br>(0.012)   | -0.020+<br>(0.012)  |
| Divorced/Separated                         | -0.020<br>(0.022)    | -0.020<br>(0.022)    | -0.022<br>(0.022)    | -0.022<br>(0.022)   |

(table A1 continued next page)

(Table A1 cont)

|                                 |                     |                     |                     |                     |
|---------------------------------|---------------------|---------------------|---------------------|---------------------|
| Parent                          | -0.005<br>(0.010)   | -0.005<br>(0.010)   | -0.005<br>(0.010)   | -0.005<br>(0.010)   |
| Homeowner                       | 0.007<br>(0.011)    | 0.007<br>(0.011)    | 0.006<br>(0.011)    | 0.007<br>(0.011)    |
| Lives with parents              | 0.005<br>(0.009)    | 0.006<br>(0.009)    | 0.007<br>(0.010)    | 0.007<br>(0.010)    |
| Arrested before age 25          | -0.003<br>(0.010)   | -0.004<br>(0.010)   | -0.005<br>(0.010)   | -0.005<br>(0.010)   |
| Employed at age 25              | 0.346***<br>(0.017) | 0.346***<br>(0.017) | 0.346***<br>(0.017) | 0.344***<br>(0.017) |
| <i>State-level controls</i>     |                     |                     |                     |                     |
| % non-Hispanic Black            |                     |                     | 0.001<br>(0.001)    | 0.001<br>(0.001)    |
| % 4-year degree or higher       |                     |                     | -0.001<br>(0.001)   | -0.001<br>(0.001)   |
| Unemployment rate               |                     |                     | -0.014**<br>(0.005) | -0.014**<br>(0.005) |
| State maximum allowable welfare |                     |                     | 0.000<br>(0.000)    | 0.000<br>(0.000)    |
| Gross state product             |                     |                     | -0.000<br>(0.000)   | -0.000<br>(0.000)   |
| Incarceration rate              |                     |                     | -0.000<br>(0.000)   | -0.000<br>(0.000)   |
| Constant                        | 0.471***<br>(0.023) | 0.487***<br>(0.026) | 0.566***<br>(0.079) | 0.568***<br>(0.078) |
| N                               | 7,166               | 7,166               | 7,166               | 7,166               |
| R <sup>2</sup>                  | 0.178               | 0.178               | 0.179               | 0.180               |

+ p<.10, \* p<.05, \*\* p<.01, \*\*\* p<.001; Standard errors in parentheses; Individual data from NLSY97; State-level hidden sentences data from NICCC, US Census, ACS, UKCPR, and BJS.

**Table A2. Linear probability models predicting young adult full-time employment (among those employed since last interview)**

|                                            | <i>Model 1</i>       | <i>Model 2</i>       | <i>Model 3</i>       | <i>Model 4</i>      |
|--------------------------------------------|----------------------|----------------------|----------------------|---------------------|
| Young adult incarceration                  | -0.143***<br>(0.033) | -0.142***<br>(0.033) | -0.143***<br>(0.033) | -0.174+<br>(0.099)  |
| Low hidden sentences<br>(referent)         | --                   | --                   | --                   | --                  |
| Mid hidden sentences                       |                      | 0.028<br>(0.020)     | 0.045+<br>(0.025)    | 0.045+<br>(0.025)   |
| High hidden sentences                      |                      | 0.047*<br>(0.020)    | 0.074*<br>(0.030)    | 0.071*<br>(0.030)   |
| <i>Interactions</i>                        |                      |                      |                      |                     |
| Incarceration X Mid HS                     |                      |                      |                      | -0.004<br>(0.109)   |
| Incarceration X High HS                    |                      |                      |                      | 0.077<br>(0.110)    |
| <i>Controls</i>                            |                      |                      |                      |                     |
| Gender (male=1)                            | 0.150***<br>(0.012)  | 0.150***<br>(0.012)  | 0.150***<br>(0.012)  | 0.150***<br>(0.012) |
| White (referent)                           | --                   | --                   | --                   | --                  |
| Black                                      | -0.007<br>(0.014)    | -0.010<br>(0.014)    | -0.018<br>(0.015)    | -0.017<br>(0.015)   |
| Other race                                 | 0.014<br>(0.016)     | 0.010<br>(0.017)     | 0.016<br>(0.017)     | 0.016<br>(0.017)    |
| Less than high school degree<br>(referent) | --                   | --                   | --                   | --                  |
| High school degree                         | 0.068**<br>(0.022)   | 0.070**<br>(0.022)   | 0.070**<br>(0.022)   | 0.069**<br>(0.022)  |
| Two-year college (no degree)               | 0.093***<br>(0.024)  | 0.093***<br>(0.024)  | 0.095***<br>(0.024)  | 0.095***<br>(0.024) |
| Two-year college (degree)                  | 0.134***<br>(0.030)  | 0.136***<br>(0.030)  | 0.136***<br>(0.030)  | 0.137***<br>(0.030) |
| Four-year college (no degree)              | 0.147***<br>(0.025)  | 0.150***<br>(0.025)  | 0.148***<br>(0.025)  | 0.148***<br>(0.025) |
| Four-year college (degree)                 | 0.209***<br>(0.024)  | 0.211***<br>(0.024)  | 0.212***<br>(0.024)  | 0.212***<br>(0.024) |
| Unmarried (referent)                       | --                   | --                   | --                   | --                  |
| Cohabiting                                 | 0.026<br>(0.016)     | 0.026<br>(0.016)     | 0.026<br>(0.016)     | 0.026<br>(0.016)    |
| Married                                    | 0.014<br>(0.016)     | 0.013<br>(0.016)     | 0.010<br>(0.016)     | 0.010<br>(0.016)    |
| Divorced/Separated                         | -0.021<br>(0.029)    | -0.023<br>(0.029)    | -0.029<br>(0.029)    | -0.029<br>(0.029)   |

(table A2 continued next page)

(Table A2 cont)

|                                 |                      |                      |                      |                      |
|---------------------------------|----------------------|----------------------|----------------------|----------------------|
| Parent                          | 0.005<br>(0.014)     | 0.004<br>(0.014)     | 0.003<br>(0.014)     | 0.003<br>(0.014)     |
| Homeowner                       | 0.010<br>(0.015)     | 0.010<br>(0.015)     | 0.009<br>(0.015)     | 0.009<br>(0.015)     |
| Lives with parents              | -0.006<br>(0.013)    | -0.008<br>(0.013)    | -0.007<br>(0.013)    | -0.007<br>(0.013)    |
| Arrested before age 25          | -0.050***<br>(0.013) | -0.049***<br>(0.013) | -0.050***<br>(0.013) | -0.050***<br>(0.013) |
| Employed full-time at age 25    | 0.193***<br>(0.012)  | 0.192***<br>(0.012)  | 0.191***<br>(0.012)  | 0.191***<br>(0.012)  |
| <i>State-level controls</i>     |                      |                      |                      |                      |
| % non-Hispanic Black            |                      |                      | 0.001<br>(0.001)     | 0.001<br>(0.001)     |
| % 4-year degree or higher       |                      |                      | 0.001<br>(0.002)     | 0.001<br>(0.002)     |
| Unemployment rate               |                      |                      | -0.015*<br>(0.007)   | -0.014*<br>(0.007)   |
| State maximum allowable welfare |                      |                      | 0.000<br>(0.000)     | 0.000<br>(0.000)     |
| Gross state product             |                      |                      | -0.000<br>(0.000)    | -0.000<br>(0.000)    |
| Incarceration rate              |                      |                      | 0.000<br>(0.000)     | 0.000<br>(0.000)     |
| Constant                        | 0.412***<br>(0.027)  | 0.379***<br>(0.032)  | 0.371***<br>(0.112)  | 0.368***<br>(0.112)  |
| N                               | 6,022                | 6,022                | 6,022                | 6,022                |
| R <sup>2</sup>                  | 0.110                | 0.111                | 0.113                | 0.114                |

+ p<.10, \* p<.05, \*\* p<.01, \*\*\* p<.001; Standard errors in parentheses; Individual data from NLSY97; State-level hidden sentences data from NICCC, US Census, ACS, UKCPR, and BJS.

**Table A3. Linear regression models predicting young adult wages (natural log)**

|                                            | <i>Model 1</i>       | <i>Model 2</i>       | <i>Model 3</i>       | <i>Model 4</i>       |
|--------------------------------------------|----------------------|----------------------|----------------------|----------------------|
| Young adult incarceration                  | -2.454***<br>(0.244) | -2.451***<br>(0.244) | -2.462***<br>(0.244) | -0.379<br>(0.685)    |
| Low hidden sentences<br>(referent)         | --                   | --                   | --                   | --                   |
| Mid hidden sentences                       |                      | -0.369*<br>(0.144)   | -0.071<br>(0.179)    | 0.034<br>(0.180)     |
| High hidden sentences                      |                      | -0.341*<br>(0.145)   | 0.160<br>(0.221)     | 0.250<br>(0.222)     |
| <i>Interactions</i>                        |                      |                      |                      |                      |
| Incarceration X Mid HS                     |                      |                      |                      | -2.340**<br>(0.752)  |
| Incarceration X High HS                    |                      |                      |                      | -2.176**<br>(0.771)  |
| <i>Controls</i>                            |                      |                      |                      |                      |
| Gender (male=1)                            | 1.035***<br>(0.091)  | 1.035***<br>(0.091)  | 1.032***<br>(0.091)  | 1.041***<br>(0.091)  |
| White (referent)                           | --                   | --                   | --                   | --                   |
| Black                                      | -0.402***<br>(0.109) | -0.366***<br>(0.110) | -0.396***<br>(0.115) | -0.390***<br>(0.115) |
| Other race                                 | 0.065<br>(0.129)     | 0.064<br>(0.130)     | 0.134<br>(0.131)     | 0.127<br>(0.131)     |
| Less than high school degree<br>(referent) | --                   | --                   | --                   | --                   |
| High school degree                         | 0.709***<br>(0.176)  | 0.703***<br>(0.176)  | 0.694***<br>(0.176)  | 0.688***<br>(0.176)  |
| Two-year college (no degree)               | 1.453***<br>(0.188)  | 1.458***<br>(0.188)  | 1.473***<br>(0.188)  | 1.470***<br>(0.188)  |
| Two-year college (degree)                  | 1.838***<br>(0.229)  | 1.830***<br>(0.229)  | 1.834***<br>(0.229)  | 1.832***<br>(0.228)  |
| Four-year college (no degree)              | 1.859***<br>(0.192)  | 1.844***<br>(0.192)  | 1.822***<br>(0.192)  | 1.809***<br>(0.191)  |
| Four-year college (degree)                 | 2.505***<br>(0.186)  | 2.498***<br>(0.186)  | 2.493***<br>(0.187)  | 2.492***<br>(0.186)  |
| Unmarried (referent)                       | --                   | --                   | --                   | --                   |
| Cohabiting                                 | 0.459***<br>(0.122)  | 0.453***<br>(0.122)  | 0.454***<br>(0.122)  | 0.452***<br>(0.122)  |
| Married                                    | -0.010<br>(0.123)    | -0.007<br>(0.123)    | -0.021<br>(0.123)    | -0.022<br>(0.123)    |
| Divorced/Separated                         | -0.447+<br>(0.240)   | -0.437+<br>(0.240)   | -0.473*<br>(0.240)   | -0.478*<br>(0.240)   |

*(table A3 continued next page)*

(Table A3 cont)

|                                 |                      |                      |                      |                      |
|---------------------------------|----------------------|----------------------|----------------------|----------------------|
| Parent                          | -0.360***<br>(0.107) | -0.355***<br>(0.107) | -0.355***<br>(0.107) | -0.355***<br>(0.107) |
| Homeowner                       | -0.049<br>(0.123)    | -0.052<br>(0.123)    | -0.066<br>(0.124)    | -0.063<br>(0.123)    |
| Lives with parents              | 0.140<br>(0.102)     | 0.150<br>(0.103)     | 0.175+<br>(0.103)    | 0.174+<br>(0.103)    |
| Arrested before age 25          | -0.268*<br>(0.105)   | -0.277**<br>(0.106)  | -0.292**<br>(0.105)  | -0.294**<br>(0.106)  |
| Wages (age 25)                  | 0.056***<br>(0.003)  | 0.056***<br>(0.003)  | 0.057***<br>(0.004)  | 0.057***<br>(0.003)  |
| <i>State-level controls</i>     |                      |                      |                      |                      |
| % non-Hispanic Black            |                      |                      | -0.003<br>(0.007)    | -0.003<br>(0.007)    |
| % 4-year degree or higher       |                      |                      | 0.019<br>(0.016)     | 0.019<br>(0.016)     |
| Unemployment rate               |                      |                      | -0.093+<br>(0.052)   | -0.093+<br>(0.052)   |
| State maximum allowable welfare |                      |                      | 0.001<br>(0.000)     | 0.001<br>(0.000)     |
| Gross state product             |                      |                      | -0.000**<br>(0.000)  | -0.000**<br>(0.000)  |
| Incarceration rate              |                      |                      | 0.001<br>(0.000)     | 0.001<br>(0.000)     |
| Constant                        | 5.470***<br>(0.204)  | 5.785***<br>(0.238)  | 5.181***<br>(0.849)  | 5.194***<br>(0.846)  |
| N                               | 7,166                | 7,166                | 7,166                | 7,166                |
| R <sup>2</sup>                  | 0.224                | 0.224                | 0.226                | 0.228                |

**Table A4. Linear regression models predicting young adult wages (earners only; natural log)**

|                                            | <i>Model 1</i>       | <i>Model 2</i>       | <i>Model 3</i>       | <i>Model 4</i>       |
|--------------------------------------------|----------------------|----------------------|----------------------|----------------------|
| Young adult incarceration                  | -0.604***<br>(0.128) | -0.602***<br>(0.128) | -0.604***<br>(0.128) | -0.251<br>(0.191)    |
| Low hidden sentences<br>(referent)         | --                   | --                   | --                   | --                   |
| Mid hidden sentences                       |                      | -0.078+<br>(0.046)   | -0.013<br>(0.062)    | 0.006<br>(0.062)     |
| High hidden sentences                      |                      | 0.034<br>(0.044)     | 0.128+<br>(0.075)    | 0.140+<br>(0.076)    |
| <i>Interactions</i>                        |                      |                      |                      |                      |
| Incarceration X Mid HS                     |                      |                      |                      | -0.488+<br>(0.271)   |
| Incarceration X High HS                    |                      |                      |                      | -0.304<br>(0.275)    |
| <i>Controls</i>                            |                      |                      |                      |                      |
| Gender (male=1)                            | 0.335***<br>(0.032)  | 0.333***<br>(0.032)  | 0.335***<br>(0.032)  | 0.335***<br>(0.032)  |
| White (referent)                           | --                   | --                   | --                   | --                   |
| Black                                      | -0.198***<br>(0.043) | -0.194***<br>(0.043) | -0.185***<br>(0.045) | -0.184***<br>(0.045) |
| Other race                                 | 0.087*<br>(0.038)    | 0.067+<br>(0.038)    | 0.061<br>(0.038)     | 0.061<br>(0.038)     |
| Less than high school degree<br>(referent) | --                   | --                   | --                   | --                   |
| High school degree                         | 0.135*<br>(0.065)    | 0.137*<br>(0.065)    | 0.135*<br>(0.065)    | 0.136*<br>(0.065)    |
| Two-year college (no degree)               | 0.414***<br>(0.064)  | 0.413***<br>(0.064)  | 0.406***<br>(0.065)  | 0.407***<br>(0.065)  |
| Two-year college (degree)                  | 0.490***<br>(0.080)  | 0.494***<br>(0.079)  | 0.488***<br>(0.079)  | 0.491***<br>(0.079)  |
| Four-year college (no degree)              | 0.540***<br>(0.067)  | 0.542***<br>(0.067)  | 0.538***<br>(0.067)  | 0.537***<br>(0.066)  |
| Four-year college (degree)                 | 0.832***<br>(0.064)  | 0.835***<br>(0.064)  | 0.828***<br>(0.064)  | 0.830***<br>(0.065)  |
| Unmarried (referent)                       | --                   | --                   | --                   | --                   |
| Cohabiting                                 | 0.011<br>(0.045)     | 0.010<br>(0.045)     | 0.008<br>(0.045)     | 0.008<br>(0.045)     |
| Married                                    | 0.055<br>(0.037)     | 0.051<br>(0.037)     | 0.053<br>(0.037)     | 0.053<br>(0.037)     |
| Divorced/Separated                         | -0.231+<br>(0.119)   | -0.237*<br>(0.119)   | -0.236*<br>(0.118)   | -0.235*<br>(0.118)   |

(table A4 continued next page)

(Table A4 cont)

|                                 |                     |                     |                     |                     |
|---------------------------------|---------------------|---------------------|---------------------|---------------------|
| Parent                          | -0.016<br>(0.036)   | -0.017<br>(0.036)   | -0.017<br>(0.036)   | -0.018<br>(0.036)   |
| Homeowner                       | 0.062<br>(0.044)    | 0.064<br>(0.044)    | 0.072<br>(0.044)    | 0.072<br>(0.044)    |
| Lives with parents              | -0.043<br>(0.036)   | -0.047<br>(0.036)   | -0.050<br>(0.036)   | -0.050<br>(0.036)   |
| Arrested before age 25          | -0.049<br>(0.036)   | -0.049<br>(0.036)   | -0.052<br>(0.036)   | -0.051<br>(0.036)   |
| Wages (age 25)                  | 0.018***<br>(0.002) | 0.018***<br>(0.002) | 0.017***<br>(0.002) | 0.017***<br>(0.002) |
| <i>State-level controls</i>     |                     |                     |                     |                     |
| % non-Hispanic Black            |                     |                     | -0.001<br>(0.003)   | -0.001<br>(0.003)   |
| % 4-year degree or higher       |                     |                     | 0.009+<br>(0.005)   | 0.009+<br>(0.005)   |
| Unemployment rate               |                     |                     | -0.013<br>(0.017)   | -0.013<br>(0.017)   |
| State maximum allowable welfare |                     |                     | 0.000<br>(0.000)    | 0.000<br>(0.000)    |
| Gross state product             |                     |                     | 0.000<br>(0.000)    | -0.000<br>(0.000)   |
| Incarceration rate              |                     |                     | 0.000<br>(0.000)    | 0.000<br>(0.000)    |
| Constant                        | 9.111***<br>(0.082) | 9.133***<br>(0.090) | 8.708***<br>(0.282) | 8.691***<br>(0.283) |
| N                               | 5,812               | 5,812               | 5,812               | 5,812               |
| R <sup>2</sup>                  | 0.215               | 0.216               | 0.217               | 0.218               |



**Table A5. Linear probability models predicting young adult employment (employed in any month since last interview)**

|                                                                            | <i>Model 1</i>       | <i>Model 2</i>       | <i>Model 3</i>       | <i>Model 4</i>       |
|----------------------------------------------------------------------------|----------------------|----------------------|----------------------|----------------------|
| <i>Mutually exclusive criminal justice contact (no contact = referent)</i> |                      |                      |                      |                      |
| Arrested only                                                              | -0.030<br>(0.022)    | -0.030<br>(0.022)    | -0.031<br>(0.022)    | 0.098**<br>(0.030)   |
| Arrested and convicted                                                     | -0.026<br>(0.026)    | -0.027<br>(0.026)    | -0.027<br>(0.026)    | 0.083<br>(0.059)     |
| Incarcerated                                                               | -0.170***<br>(0.025) | -0.170***<br>(0.025) | -0.171***<br>(0.025) | -0.017<br>(0.067)    |
| Low hidden sentences<br>(referent)                                         | --                   | --                   | --                   | --                   |
| Mid hidden sentences                                                       |                      | -0.018<br>(0.013)    | -0.006<br>(0.016)    | 0.010<br>(0.017)     |
| High hidden sentences                                                      |                      | -0.019<br>(0.013)    | 0.002<br>(0.020)     | 0.019<br>(0.021)     |
| <i>Interactions</i>                                                        |                      |                      |                      |                      |
| Arrested X Mid HS                                                          |                      |                      |                      | -0.092*<br>(0.041)   |
| Arrested X High HS                                                         |                      |                      |                      | -0.190***<br>(0.048) |
| Convicted X Mid HS                                                         |                      |                      |                      | -0.170*<br>(0.071)   |
| Convicted X High HS                                                        |                      |                      |                      | -0.080<br>(0.071)    |
| Incarcerated X Mid HS                                                      |                      |                      |                      | -0.167*<br>(0.075)   |
| Incarcerated X High HS                                                     |                      |                      |                      | -0.168*<br>(0.077)   |
| Constant                                                                   | 0.472***<br>(0.023)  | 0.489***<br>(0.026)  | 0.568***<br>(0.079)  | 0.559***<br>(0.079)  |
| <i>Controls included</i>                                                   |                      |                      |                      |                      |
| Individual-level                                                           | Yes                  | Yes                  | Yes                  | Yes                  |
| State-level                                                                | No                   | No                   | Yes                  | Yes                  |
| N                                                                          | 7,166                | 7,166                | 7,166                | 7,166                |
| R <sup>2</sup>                                                             | 0.178                | 0.178                | 0.179                | 0.182                |

+ p<.10, \* p<.05, \*\* p<.01, \*\*\* p<.001; Standard errors in parentheses; Individual data from NLSY97; State-level hidden sentences data from NICCC

**Table A6. Linear probability models predicting young adult full-time employment (among those employed since last interview)**

|                                                                            | <i>Model 1</i>       | <i>Model 2</i>       | <i>Model 3</i>       | <i>Model 4</i>     |
|----------------------------------------------------------------------------|----------------------|----------------------|----------------------|--------------------|
| <i>Mutually exclusive criminal justice contact (no contact = referent)</i> |                      |                      |                      |                    |
| Arrested only                                                              | -0.161***<br>(0.032) | -0.160***<br>(0.033) | -0.163***<br>(0.032) | 0.010<br>(0.110)   |
| Arrested and convicted                                                     | -0.072*<br>(0.035)   | -0.069+<br>(0.036)   | -0.069+<br>(0.036)   | 0.041<br>(0.083)   |
| Incarcerated                                                               | -0.160***<br>(0.033) | -0.159***<br>(0.033) | -0.161***<br>(0.033) | -0.181+<br>(0.099) |
| Low hidden sentences<br>(referent)                                         | --                   | --                   | --                   | --                 |
| Mid hidden sentences                                                       |                      | 0.029<br>(0.020)     | 0.045+<br>(0.025)    | 0.056*<br>(0.026)  |
| High hidden sentences                                                      |                      | 0.046*<br>(0.020)    | 0.072*<br>(0.030)    | 0.083**<br>(0.031) |
| <i>Interactions</i>                                                        |                      |                      |                      |                    |
| Arrested X Mid HS                                                          |                      |                      |                      | -0.155<br>(0.118)  |
| Arrested X High HS                                                         |                      |                      |                      | -0.231+<br>(0.121) |
| Convicted X Mid HS                                                         |                      |                      |                      | -0.138<br>(0.099)  |
| Convicted X High HS                                                        |                      |                      |                      | -0.125<br>(0.098)  |
| Incarcerated X Mid HS                                                      |                      |                      |                      | -0.017<br>(0.109)  |
| Incarcerated X High HS                                                     |                      |                      |                      | 0.066<br>(0.110)   |
| Constant                                                                   | 0.418***<br>(0.026)  | 0.386***<br>(0.032)  | 0.379***<br>(0.111)  | 0.359**<br>(0.111) |
| <i>Controls included</i>                                                   |                      |                      |                      |                    |
| Individual-level                                                           | Yes                  | Yes                  | Yes                  | Yes                |
| State-level                                                                | No                   | No                   | Yes                  | Yes                |
| N                                                                          | 6,022                | 6,022                | 6,022                | 6,022              |
| R <sup>2</sup>                                                             | 0.115                | 0.116                | 0.118                | 0.119              |

+ p<.10, \* p<.05, \*\* p<.01, \*\*\* p<.001; Standard errors in parentheses; Individual data from NLSY97; State-level hidden sentences data from NICCC

**Table A7. Linear regression models predicting young adult earnings**

|                                                                            | <i>All Respondents</i> |                      |                      |                      | <i>Earners Only</i> |
|----------------------------------------------------------------------------|------------------------|----------------------|----------------------|----------------------|---------------------|
|                                                                            | <i>Model 1</i>         | <i>Model 2</i>       | <i>Model 3</i>       | <i>Model 4</i>       | <i>Model 5</i>      |
| <i>Mutually exclusive criminal justice contact (no contact = referent)</i> |                        |                      |                      |                      |                     |
| Arrested only                                                              | -0.703**<br>(0.258)    | -0.695**<br>(0.257)  | -0.704**<br>(0.257)  | 1.687***<br>(0.366)  | 0.316+<br>(0.166)   |
| Arrested and convicted                                                     | -0.503+<br>(0.277)     | -0.521+<br>(0.276)   | -0.519+<br>(0.277)   | 0.939*<br>(0.423)    | 0.040<br>(0.121)    |
| Incarcerated                                                               | -2.549***<br>(0.246)   | -2.546***<br>(0.245) | -2.559***<br>(0.246) | -0.336<br>(0.687)    | -0.259<br>(0.191)   |
| Low hidden sentences<br>(referent)                                         | --                     | --                   | --                   | --                   | --                  |
| Mid hidden sentences                                                       |                        | -0.368*<br>(0.144)   | -0.073<br>(0.179)    | 0.193<br>(0.185)     | 0.041<br>(0.064)    |
| High hidden sentences                                                      |                        | -0.346*<br>(0.146)   | 0.151<br>(0.222)     | 0.385+<br>(0.227)    | 0.167*<br>(0.077)   |
| <i>Interactions</i>                                                        |                        |                      |                      |                      |                     |
| Arrested X Mid HS                                                          |                        |                      |                      | -2.341***<br>(0.516) | -0.870**<br>(0.274) |
| Arrested X High HS                                                         |                        |                      |                      | -2.810***<br>(0.534) | -0.641**<br>(0.204) |
| Convicted X Mid HS                                                         |                        |                      |                      | -2.221***<br>(0.599) | -0.087<br>(0.170)   |
| Convicted X High HS                                                        |                        |                      |                      | -1.095+<br>(0.603)   | -0.244<br>(0.176)   |
| Incarcerated X Mid HS                                                      |                        |                      |                      | -2.509***<br>(0.754) | -0.526+<br>(0.271)  |
| Incarcerated X High HS                                                     |                        |                      |                      | -2.317**<br>(0.773)  | -0.330<br>(0.275)   |
| Constant                                                                   | 5.502***<br>(0.204)    | 5.819***<br>(0.239)  | 5.218***<br>(0.851)  | 5.043***<br>(0.847)  | 8.648***<br>(0.282) |
| N                                                                          | 7,166                  | 7,166                | 7,166                | 7,166                | 5,812               |
| R <sup>2</sup>                                                             | 0.225                  | 0.226                | 0.228                | 0.231                | 0.223               |

+ p<.10, \* p<.05, \*\* p<.01, \*\*\* p<.001; Standard errors in parentheses; Individual data from NLSY97; State-level hidden sentences data from NICCC, US Census, ACS, UKCPR, and BJS.
